# Supplementary material for: With Some Help From My Network: Supplementing eHealth Literacy With Social Ties
Source: PubMed Central journal article supplement (PMC5391437; doi:10.2196/jmir.6472), 2017-03-30
Supplement: jmir_v19i3e98_app2.pdf [file jmir_v19i3e98_app2.pdf]

**Appendix 2: Descriptive statistics of the "ease of obtaining help in performing online activities", "perceived eHealth literacy", "finding others with similar health concerns", and the perceived outcome of Internet use measures.**

| <b>Item used to measure Ease of obtaining help in performing online activities</b>                                                                                     | <b>Average score for Israeli Jews (SD)</b> | <b>Average score for PCI (SD)</b> |
|------------------------------------------------------------------------------------------------------------------------------------------------------------------------|--------------------------------------------|-----------------------------------|
| When you need advice or help surfing the Internet, for example help in finding a particular site or service, how easy is it for you to find someone who will help you? | 2.04 (2.1)<br>(n=677)                      | 1.45 (2.12)<br>(n=135)            |

| <b>Item used to measure finding others with similar health concerns</b>                                                                               | <b>Average score for Israeli Jews (SD)</b> | <b>Average score for PCI (SD)</b> |
|-------------------------------------------------------------------------------------------------------------------------------------------------------|--------------------------------------------|-----------------------------------|
| During the past 12 months, how often have you used the Internet for finding others with health issues or concerns similar to the ones you are facing? | 1.78 (.85)<br>(n=682)                      | 1.6 (.78)<br>(n=136)              |

| <b>Item used to measure perceived eHealth literacy</b>        | <b>Average score for Israeli Jews (SD)</b> | <b>Average score for PCI (SD)</b> |
|---------------------------------------------------------------|--------------------------------------------|-----------------------------------|
| I know how to find helpful health resources on the Internet   | 1.8 (1.93)<br>(n=680)                      | 1.58 (1.97)<br>(n=136)            |
| I know how to use the Internet to answer my health questions  | 1.79 (1.93)<br>(n=678)                     | 1.66 (2.05)<br>(n=136)            |
| I know what health resources are available on the Internet    | 1.8 (1.93)<br>(n=680)                      | 1.58 (1.97)<br>(n=136)            |
| I know where to find helpful health resources on the Internet | 1.82 (1.94)<br>(n=679)                     | 1.59 (1.97)<br>(n=136)            |

|                                                                                  |                        |                        |
|----------------------------------------------------------------------------------|------------------------|------------------------|
| I know how to use the health information I find on the Internet to help me       | 1.69 (1.87)<br>(n=669) | 1.54 (1.94)<br>(n=163) |
| I have the skills I need to evaluate the health resources I find on the Internet | 1.69 (1.84)<br>(n=675) | 1.46 (1.82)<br>(n=136) |
| I can tell high quality from low quality health resources on the Internet        | 1.6 (1.82)<br>(n=677)  | 1.39 (1.76)<br>(n=136) |
| I feel confident in using information from the Internet to make health decisions | 1.4 (1.63)<br>(n=676)  | 1.29 (1.66)<br>(n=136) |

| <b>Item used to measure perceived health outcomes</b>                                                    | <b>Average score for Israeli Jews (SD)</b> | <b>Average score for PCI (SD)</b> |
|----------------------------------------------------------------------------------------------------------|--------------------------------------------|-----------------------------------|
| Improved your ability to manage your health needs.                                                       | 1.27 (1.56)<br>(n=672)                     | 1.22 (1.66)<br>(n=136)            |
| Enabled you to ask your physician questions resulting from the information you acquired on the Internet. | 1.7 (1.93)<br>(n=672)                      | 1.48 (1.84)<br>(n=136)            |
| Enabled you to show your physician the information that you retrieved.                                   | 1.5 (1.77)<br>(n=666)                      | 1.37 (1.77)<br>(n=135)            |
| Increased your sense of power in your encounter with the physician.                                      | 1.24 (1.58)<br>(n=667)                     | 1.51 (1.9)<br>(n=136)             |
| Improved your understanding of the symptoms, conditions, or treatments in which you were interested.     | 1.68 (1.87)<br>(n=671)                     | 1.55 (1.89)<br>(n=136)            |
| Revised your knowledge of health innovations                                                             | 1.6 (1.82)<br>(n=671)                      | 1.43 (1.8)<br>(n=136)             |
| Led you to take independent steps (such as seeing a specialist, or changing an exercise regimen or       | 1.51 (1.8)<br>(n=667)                      | 1.4 (1.79)<br>(n=136)             |

|                                                                              |                        |                        |
|------------------------------------------------------------------------------|------------------------|------------------------|
| eating habits).<br>Enabled you to think about alternative treatment options. |                        |                        |
| Enabled you to think about alternative treatment options.                    | 1.4 (1.71)<br>(n=669)  | 1.37 (1.77)<br>(n=136) |
| Made you more aware of patients' insurance-related rights.                   | 1.38 (1.72)<br>(n=658) | 1.36 (1.75)<br>(n=135) |
